Bygren & al. Early life Feast and Famine: The Methylome of disparate stressors inherited

1       **Title: Paternal grandparental exposure to crop failure or surfeit during a childhood**  
2               **slow growth period and epigenetic marks on third generation's growth-,**  
3                               **glucoregulatory and stress genes**

4       **Authors:** Lars Olov Bygren<sup>1,2\*</sup>, Patrick Müller<sup>1</sup>, David Brodin<sup>1</sup>, Gunnar.Kaati<sup>1</sup>, Jan-Åke  
5       Gustafsson<sup>1</sup>, John G. Kral<sup>3</sup>

6       **Affiliations:**

7       <sup>1</sup> Department of Biosciences and Nutrition, Karolinska Institutet, SE\_14183 Huddinge,  
8       Sweden.

9       <sup>2</sup> Department of Community Medicine and Rehabilitation, Umeå University, SE\_90187,  
10      Umeå, Sweden.

11      <sup>3</sup> SUNY Downstate Medical Center, 450 Clarkson Avenue, Box 40, Brooklyn, NY 11203,  
12      USA.

13      \* Correspondence to: [lars.olov.bygren@ki.se](mailto:lars.olov.bygren@ki.se)

Bygren & al. Early life Feast and Famine: The Methyloome of disparate stressors inherited

14 **Abstract:** This latest in our series of papers describes transgenerational methylation related to  
15 mid-childhood food availability in 19<sup>th</sup> century Överkalix, Sweden. Failed vs. bountiful crops  
16 differentially influenced methylation in grandchildren of exposed paternal grandparents. In  
17 this case study of 8 tracked cases with differential ancestral exposure, adult progeny differed  
18 in methylated CpGs in three Amigo site gene pathways: “insulin processing”, “adipose tissue  
19 growth” and “hypothalamic development”, reflecting famine, excess food and reaction to  
20 food-insecurity stress. This is the first demonstration of transgenerational epigenetic  
21 inheritance in humans following grandparental childhood exposure, an early developmental  
22 origin of adult disease.

23 **Non-technical summary:** Paternal grandparent food supply preceding their prepubertal  
24 growth spurt induced epigenetic marks in three gene pathways reflecting famine, excess food  
25 and reaction to food-insecurity stress. Our epidemiological findings of adverse  
26 transgenerational effects of ancestral overnutrition and conversely, beneficial effects of  
27 famine during SGP<sup>1</sup> prompted us to study individuals whose paternal grandparents were  
28 randomly exposed, during their Slow Growth Period (SGP) - a sensitive period preceding the  
29 pre-pubertal growth spurt - to failed or bumper crops potentially engendering epigenetic  
30 marks on mechanistic molecular gene pathways.

31 For detailed analyses of specific gene ontology (GO) pathways, we tested the three posited  
32 structural classes of genes associated with each of 40 preselected GO terms  
33 (<http://amigo.geneontology.org>) for differentially methylated CpG positions (DMRs) between  
34 the experimental groups. We selected GO pathways with average differences in methylation  
35 between groups  $>0.1$  and  $p$ -values  $<0.05$  and performed detailed analyses of those differing  
36  $> 5\%$ . The posited pathways comprised gluoregulatory genes that were seen as immediate  
37 sensors of decreased glycogen stores, whereas lipids and ketones were posited to reflect the  
38 duration and magnitude of the fast or responses to overnutrition. Individual reactions to food  
39 insecurity were assumed to have activated the HPA-axis. We focused on two putative  
40 response lines in direct descendants from a) grandfather to son with grandson and b) paternal  
41 grandmother to son with granddaughter, adjusted for crop size during famine or surfeit. We  
42 found 39 DMRs in grandchildren after grandparental differential exposure to food availability  
43 in GO-pathways associated with famine, excess food and reactions to environmental stressors.  
44 Nine of them were large, three GOs exhibiting remarkable DMRs in grandchildren (Table 1).

Bygren & al. Early life Feast and Famine: The Methyloome of disparate stressors inherited

## 45 **Results**

46 Exploiting a natural experiment, we studied the paternal lineage transgenerational responses  
47 in grandsons and granddaughters and assessed their DNA-methylations. We found 39 DMRs  
48 among 40 posited pathways in Islands, North and South shores, North and South shelves  
49 related to famine, excess and stress, 9 pathways with DMRs above 5%, and 3 above 14%.

### 50 **Paternal grandparents' exposure vs. methylated genes in the adult grandchild** 51 **methylation.**

52 The main metabolic pathways implicated in grandpaternal SGP exposure to food-insecurity  
53 stress transferred to grandsons were “appetite”, “insulin processing”, “ketone body catabolic  
54 process” and “hypothalamic development”. Differential grandmaternal exposure to feast or  
55 famine were associated with marks in “adipogenesis”, “insulin-like growth factor reception  
56 (IGF-R) binding”, “ketone body catabolic process” and “adrenal gland development” (Table  
57 1).

58 *Three sentinel metabolic pathways implying transgenerational epigenetic inheritance.*

59 GO:0030070 “insulin processing” influences insulin from proteolysis of the precursor  
60 proinsulin via C-peptide. This is the first signal sequence elevated from proinsulin.  
61 Proinsulin is then cleaved to release the C peptide. This pathway had a DMR in the male line  
62 found in the Southern Shore involving 2 genes: PCSK2, proprotein convertas (also called  
63 NE2 HUMAN) and CPE Carboxypeptidase E (also called CPBE HUMAN). The pathway is  
64 related to GO 1901142 “insulin metabolic process”.

65 GO:1904179, “adipose development” includes gene NR1H4 (also called BAR;FXR;HRR1;  
66 RIP14) the nuclear hormone receptor pthr 24082, “bile acid receptor”. Other genes are SIRT1  
67 (also called SIR2L1) and chromatin regulatory protein sir2. pthr 11085

68 GO 21854 “hypothalamus development”, involves GSX1(GShomebox 1), PTX2 (Pituitary  
69 homebox 2), UBB (Polyubiquitin-B) and CRH (Corticoliberin)

70 *Parental age data and selection*

71 Average age at birth of first child was 32 years, 31 years and 27 years in the three generations  
72 when grandparents had been exposed to famine and 34 years, 27 years and 27 years when  
73 grandparents had been exposed to feast. All seven index persons were alive at the age of 74,

Bygren & al. Early life Feast and Famine: The Methyloome of disparate stressors inherited

74 one died at the age of 63. For grandparents and parents exposed to famine during SGP, the  
75 average age of death was 61 years and 78 years whereas when correspondingly exposed to  
76 feast it was 87 years and 71 years (Table 2).

## 77 **Discussion**

78 We present a case series of epigenomes of 8 adult grandchildren with archival data exhibiting  
79 their paternal grand-paternal or -maternal exposure to crop failure or large crops during their  
80 SGP linked to differential methylation of genes associated with energy balance and  
81 hypothalamic development. The salient novel finding is that grandparental childhood  
82 exposure was reflected in grandchild profiles of CpG methylation of key genes.

83 In earlier papers we described a unique cohort of descendants of grandparents exposed  
84 randomly to these weather-dependent variations in food availability. Data emanated from  
85 detailed archival records enabling correlations between demographic and crop yield  
86 statistics<sup>1,2,3,4,5,6</sup>. Our SGP findings have been confirmed in Germany for food deprivation<sup>7</sup>  
87 and in Sweden for parental loss<sup>8</sup>. Our current paper adds mechanistic information based on  
88 blood sampling of eight 75-year-old grandchildren enabling determination of candidate  
89 epigenetic markers reflecting differential methylation in gene pathways posited to be affected  
90 by exposure of their grandparents to crop failure versus bountiful harvest during the  
91 grandparental childhood SGP preceding the prepubertal peak stature growth.

92 We propose that known adaptations to energy deficiency or excess in cells, organs or  
93 organisms are expressed transgenerationally appearing as epigenetic marks in humans.  
94 Famine might induce marks around promoters in at least two types of pathways: one general  
95 or nutrient-specific, related to diminished substrate stores of glycogen, lipid or protein, and/or  
96 excess, nutritoxic exposure, the other to environmental stresses of famine through activation  
97 of the hypothalamo-pituitary-adrenal (HPA) axis. Based on our epidemiological findings of  
98 transgenerational inheritance we posited that changes in DNA methylation levels of cytosine  
99 and guanine (CpG probes) differentially methylated to form 5-methylcytosine affecting genes  
100 in one generation can explain transgenerational epigenetic inheritance in the third generation<sup>9</sup>.

101 A 2015 review concluded that evidence suggesting that acquired epigenetic marks are passed  
102 to the next generation was limited and many other have noted the absence of any mechanism  
103 by which gene-regulatory information is transferred from somatic cells to germ cells in the

Bygren & al. Early life Feast and Famine: The Methylome of disparate stressors inherited

104 study of transgenerational epigenetic inheritance, reviewed in Nagy and Turecki<sup>10</sup>. Our  
105 epidemiological and epigenetic results demonstrate sex differences, e.g. in development of  
106 preproinsulin as has been seen in human pancreatic islets<sup>11</sup>. The sex-bound epigenetic  
107 inheritance has been interpreted simply as epigenetic actions and disease manifestations being  
108 sex specific, as is the case with many conventional genetic variants<sup>12</sup>. The transcriptions are  
109 also not fully understood. Most confusion emanates from not knowing how exposed somatic  
110 cells can communicate their exposure to the germline which induces changes lasting for  
111 generations.

112 It is difficult to get an insight into epigenetic inheritance if one believes in a real rather than  
113 just a theoretical barrier between somatic and germline cells. One route overcoming the  
114 barrier might be extracellular nano-vesicles of neighboring to germ cells shed by somatic cells  
115 containing the material required for transcription able to bypass the barrier<sup>13</sup>. In the SGP the  
116 male primordial germ cells form active spermatozoa whereas human ovarian stem cells that  
117 can be modified in the SGP probably are required.

118 Presently the preponderance of evidence suggests transgenerational cumulative effects of  
119 exposures: diet, behavior, environmental chemicals, activity and the microbiome. For reviews  
120 see Sales et al.<sup>9</sup> and Vaiserman et al.<sup>14</sup>.

121 We have focused on the paternal line to discern transgenerational epigenetic inheritance  
122 disentangled from maternal-fetal and maternal-infant influences. The pathways in the paternal  
123 line are probably similar in the maternal line. We found three interesting gene pathways  
124 influenced by paternal grandparents' exposure resulting in grandchildren's DMRs, pathways  
125 induced by famine, overnutrition and food insecurity stress. When the paternal grandfather  
126 had been exposed to famine, the grandson exhibited DMRs of insulin processing. When the  
127 paternal grandmother had been exposed the granddaughter had DMRs of GOs related to the  
128 environmental stress such as "hypothalamus development"(influencing the HPA-axis) related  
129 to increased female susceptibility to stress, yet explaining the benefit to mental health recently  
130 found in a different setting<sup>7</sup>.

131 A strength of this study is that it exploits a natural secular phenomenon viz. variable food  
132 security, the effects of which are documented in a homogeneous well documented 19<sup>th</sup>  
133 century population, allowing exceptional tracking of ancestors. Few founders colonized the  
134 area 500 years earlier whereby the area metaphorically became an island of native speakers of  
135 Swedish surrounded by Sami- and Finnish-speaking neighbors. Furthermore the index

Bygren & al. Early life Feast and Famine: The Methylome of disparate stressors inherited

136 persons, the grandchildren are dispersed all over Sweden<sup>5</sup> and have neither been exposed to  
137 famine nor, being born before WW2, experienced current food excesses during their  
138 childhood.

139 A second strength is the focus on two lines of inheritance that emerged in the epidemiological  
140 studies, the line from the paternal grandmother's son and his daughter and the line from the  
141 paternal grandfather with son and grandson. Thirdly our *a priori* selection of gene ontologies,  
142 GOs, based on our earlier epidemiological findings of cardiovascular morbidity related to  
143 food security reduces the risk of spurious correlations. A confound of multiple testing could  
144 be suspected having 40 GOs but the ontologies were chosen for their evidence based  
145 responses to only three potential pathways: feast, famine and stress.

146 Our earlier published studies in the community and correlation of age at the birth of the first  
147 child, number of children and variance of survival over three generations ruled out that  
148 variable availability of food during SGP was caused selectively<sup>2</sup>. In human studies measures  
149 are very crude but the figures for the eight subjects do not demonstrate any biased selection  
150 owing to ancestors' random exposure during the SGP. The main weakness is having only 8  
151 index cases causing low statistical power. Furthermore, these 8 were survivors aged 75 years  
152 during which their own exposures might have induced methylations confounding those  
153 inherited from the grandparents and parents. On the other hand epimutations analogous to  
154 mutation most often do not appear on the clinical horizon until late in life.

155 Confounding could have occurred through differences in the exposure to the feast and famine  
156 between index cases owing to social circumstances such as being member of a family with  
157 better food resources, or genes affecting sensitivity to undernutrition, or cellular heterogeneity  
158 differentially affecting allele-specific or other variables' methylation<sup>12</sup>. However, the natural  
159 experiment exposed all families, showing little variation in poverty in the 19<sup>th</sup> century  
160 mitigating such confound, supported by our earlier research in the community<sup>4</sup>. The  
161 isolation of the community during the centuries up to the present might have resulted in an in-  
162 bred cohort and diminished assortative mating, both benefitting the epigenetic analysis.

163 Human transgenerational inheritance still awaits more studies in other settings. Two questions  
164 are pressing. How many generations can the epigenetic marks in humans persist? Our own  
165 recent unpublished studies in a different setting indicate that it persists at least for four  
166 generations. The effects and mechanisms of interaction between genetic and epigenetic  
167 inheritance also remain to be determined.

Bygren & al. Early life Feast and Famine: The Methyloome of disparate stressors inherited

168 We describe in a small case study of 8 subjects the presence of epigenetic changes attributable  
169 to environmental influences potentially engendering several multifactorial diseases and  
170 conditions potentially providing guidance for preventive and therapeutic interventions  
171 targeting methylation.

## 172 **Methods**

### 173 **Classification of exposure to food availability in the environment**

174 A tradition of using a scale for crop estimates was introduced for the years 1816-1849 in  
175 Statistics Sweden (Tabellverket) by the 19<sup>th</sup> century statistician Hellstenius<sup>15</sup>. It was a seven-  
176 degree scale running from total failure to good or bountiful crop and has been used since in  
177 demographic research. For the years 1865-1902, time of our 8 grandparents' births, statistical  
178 tables of crop yields were the primary source, validated against food price statistics<sup>16</sup>,  
179 and qualitative reports from a gubernatorial office (Hushållningssällskapet) of crops and  
180 government aid. Using these sources, we created an ordinal seven-item "Hellstenius scale".  
181 Over the years the criteria for the items of the scale have changed apace with changes in the  
182 Swedish language. The current translation is as follows: Total failure (0), Sparse general  
183 growth (1), Weak or Small (2), Below average (3), Average or mediocre (4), Above average  
184 (5) and Good or bountiful (6) crop. We defined 0-2 as famine, 3-4 as mediocre, and 5-6 as  
185 excess food availability. We empirically used May 1 of the year following crop failure as the  
186 time of least food availability and November 1 of the year following good harvest and  
187 slaughtering of pigs and cattle as the time of greatest food availability (excess). Grandparent  
188 age on those dates was used to relate food availability to his or her SGP.

### 189 **SGP, The slow growth period**

190 Two periods in our first analysis were posited to differ in demand for food during famines and  
191 consequently to differ in transgenerational responses: the prepubertal growth peak and the  
192 preceding slow growth period. These two periods were derived by superimposing the stature  
193 growth velocity curves of Prader et al<sup>17</sup> and the ages of 19<sup>th</sup> century pubarche described by  
194 Tanner<sup>18</sup>. The periods for ancestors in the 19<sup>th</sup> century were set at the ages 8-11 years for  
195 female ancestors and at 9-12 years of age for male ancestors. Excess food was not considered  
196 to be an issue in the 19<sup>th</sup> century Överkalix but to analyze potential transgenerational  
197 responses we were obliged to focus on the SGP were we indeed found mismatches reflecting  
198 transgenerational responses not only to famine but also to excess food availability. Thus, we

Bygren & al. Early life Feast and Famine: The Methyloome of disparate stressors inherited

199 introduced the concept of the “slow growth period”<sup>1</sup>, the causes and mechanisms of which we  
200 discuss here in depth.

### 201 **Samples and pedigrees**

202 Eight subjects, alive at 75 years of age and consenting to blood sampling were selected from  
203 the 1935 birth cohort in an original epidemiologic study of transgenerational responses to  
204 variable availability of food during ancestors’ SGP in Överkalix, Sweden, described in  
205 Tinghög et al<sup>5</sup>. Two paternal grandmothers were exposed during SGP to famine (grade 0-2) in  
206 1867 and 1900 respectively, and two were exposed to surfeit (grade 5-6) in 1871 and 1879.  
207 Two paternal grandfathers were exposed to famine (grade 0-2) in 1867 and 1877 respectively  
208 and two were exposed to surfeit (grade 5-6) in 1887 and 1881. These subjects represented four  
209 pairs of grandchildren of paternal grandparents exposed to feast or famine (Fig1).

210 Whole blood samples in EDTA were drawn at county health services units close to the  
211 subjects’ residence, frozen at 70° C and sent to the project center. Pedigrees were originally  
212 tracked at parish offices in Sweden and Finland and presently in the National archive, the  
213 Regional archive of north Sweden, the Research archive of Umeå University, the National tax  
214 bureau and digitalized genealogical net-based registers.

### 215 **Metabolic pathways posited**

216 The gene ontologies chosen *a priori* described processes related to cardiovascular risks and  
217 were related to hunger, excess food and reactions to environmental stress.  
218 (<http://amigo.geneontology.org>). Posited processes during *famine* were “glucose homeostasis”  
219 and “glucose transport”, “ketone body biosynthesis and catabolic processes”, “cellular ketone  
220 body metabolic pathways”, and “cholesterol homeostasis”. In *hunger and excess* “insulin  
221 processing and binding”, insulin-like growth factor”, “insulin receptor signaling and  
222 “autophagy pathways” were posited. Individuals’ reactions to disasters were assumed to  
223 influence hypothalamus and adrenal gland development. Availability and absorption of folate  
224 stimulating methyl donors was of obvious interest. Other posited GOs include appetite,  
225 ghrelin, leptin, calcium signaling, eating behavior, adipose and fat cell development, insulin  
226 secretion, and lipids.

227 Altogether these added up to 40 pathways, many of them overlapping and covering three  
228 kinds of pathways reflecting the three posited reactions.



Bygren & al. Early life Feast and Famine: The Methyome of disparate stressors inherited

## 229 **Genome-wide methylation**

230 Genomic DNA extraction from whole-blood (in one case from buffy coat) was carried out  
231 using GeneCatcher Blood kit (Invitrogen, Carlsbad, CA, USA). 500 ng of genomic DNA was  
232 bisulfite converted with EZ-96 DNA Methylation kit (Zymo Research, Irvine, CA, USA) and  
233 genome wide DNA methylation analysis was carried out using the Infinium MethylationEPIC  
234 Bead Chip (Illumina, San Diego, CA, USA). The Laboratory procedures were done according  
235 to the manufacturers' protocol.

236 The array was designed for genome wide methylation analysis with coverage across gene  
237 regions with sites in the promoter region, 5UTR, enhancer and gene body, and interrogating  
238 more than 850 000 methylation sites at single nucleotide resolution. This technique uses two  
239 different probe types (Infinium 1 and 2) with different characteristics, thus requiring  
240 normalization to reduce technical bias. For analysis, visualization and extraction of  
241 methylation data GenomeStudio software version 2011.1 (Illumina Inc) was used.

242 Methylation levels (beta values) were estimated as the ratio of signal intensity of the  
243 methylated alleles to the sum of methylated and unmethylated intensity signals. The beta-  
244 values vary from 0 (no methylation) to 1 (100% methylation).

245 The chip covers CpG islands, shores, shelves and the promoted genes. GOs containing genes  
246 and biological pathways were assigned from the literature, primarily from the Gene Ontology  
247 project ([geneontology.org](http://geneontology.org)) chosen from their known intra-generational relation to excess and  
248 lack of food.

249 The assay protocol combined bisulfite conversion of genomic DNA and whole-genome  
250 amplification with array-based capture and scoring of the CpG loci. Signal intensity was  
251 measured by scanner to generate beta values, the degree of methylation at a locus. Allele-  
252 specific single base extension of the probes incorporated a biotin nucleotide or a dinitrophenyl  
253 labeled nucleotide. Signal amplification of the incorporated label further improved the overall  
254 signal-to-noise ratio of the assay.

255 Human genomes punctuated by DNA sequences with high frequencies of CpG sites, >200  
256 bases, with CpG content of 50% were termed "islands" (CGIs). Differential methylation  
257 induced by environment visible in CGIs or in "northern- and southern-*shores*", within 2 kilo  
258 base-pairs (<2kbp) of the islands, and "northern- and southern *shelves*" <2 kbp from the

Bygren & al. Early life Feast and Famine: The Methylome of disparate stressors inherited

259 shores were studied in CGIs, shores and shelves in grandchildren of grandparents having  
260 experienced extremes of food availability during their childhood SGP.

### 261 **Statistical analysis**

262 The association between genes and GO terms was retrieved from Gene Ontology Association  
263 (UniProt-GOA) Database, <http://www.ebi.ac.uk/GOA>.

264 Number of genes associated with a GO term and represented with at least one probe on the  
265 EPIC chip and number of probes associated with the genes were analyzed among index cases,  
266 the grandchildren.

267 Differentially methylated female index cases whose paternal grandmothers were exposed to  
268 bumper harvests in their mid-childhood SGP and to crop failure respectively were recorded as  
269 well as male index cases whose paternal grandfather had the same extreme exposures.

270 The criteria for differential methylation was a p-value < 0.05 and an average difference in  
271 beta-value between the group averages >0.1. The share of differentially methylated probes  
272 was given as percent.

273 Tables were prepared after beta-mixture quantile normalization (BMIQ) correcting probe  
274 design bias. Tables were prepared with the BMIQ-normalised beta values and annotations.  
275 The analyses were carried out in Bioconductor-package ChAMP package default probe  
276 filtering based on detection p-value, minimum bead count and probes possibly confounded by  
277 SNPs and cross hybridisation (<https://www.ncbi.nlm.nih.gov/pubmed/24063430>) left 813007  
278 probes for further analysis.

### 279 **References**

280 1.Bygren LO, Kaati G, Edvinsson E. Longevity determined by paternal ancestors' nutrition  
281 during their slow growth period. *Acta Biotheoretica* 2001;49:53-59.

282 2.Kaati G, Bygren LO, Edvinsson S. Cardiovascular and diabetes mortality  
283 determined by nutrition during parents' and grandparents' slow growth period.  
284 *Eur J Hum Genet* 2002;10:682-8.  
285

286 3.Pembrey ME, Bygren LO, Kaati G, Edvinsson S, Northstone K et al. Sex-specific, male-line  
287 transgenerational responses in humans. *Eur J Hum Genet* 2006;14:159-166

288 4.Kaati G, Bygren LO, Pembrey M, Sjostrom M. Transgenerational response to  
289 nutrition, early life circumstances and longevity. *Eur J Hum Genet* 2007;15:784-90.  
290

Bygren & al. Early life Feast and Famine: The Methyloome of disparate stressors inherited

- 291 5. Tinghög P, Carstensen J, Kaati G, Edvinsson S, Sjöström M, Bygren LO.  
292 Migration and mortality trajectories: a study of individuals born in the rural community of  
293 Överkalix. *Soc Sci Med*. 2011;73:744-51.  
294
- 295 6. Bygren LO, Tinghög P, Carstensen J, Edvinsson S, Kaati G, Pembrey ME,  
296 Sjöström M. Change in paternal grandmothers' early food supply influenced  
297 cardiovascular mortality of the female grandchildren. *BMC Genet* 2014;15:12.
- 298 7. Van den Berg GJ, Pinger PR. Transgenerational effects of childhood conditions on third  
299 generation health and educational outcomes. *EconHumBiol* 2016;23:103-120.
- 300 8. Vågerö D, Rajaleid K. Does childhood trauma influence offspring's birth  
301 characteristics? *IntJEpidemiol* 2016;
- 302 9. Sales VM, Ferguson-Smith AC, Patti ME. Epigenetic mechanisms of transmission of  
303 metabolic disease across generations. *Cell Met* 2017;25:559-571.  
304
- 305 10. Nagy C, Turecki G. Transgenerational epigenetic inheritance: an open discussion.  
306 *Epigenomics* 2015;7:781-790.
- 307 11. Hall E, Volkov P, Dayeh T, Esguerra JLS, Salö S et al. Sex difference in the genome-wide  
308 DN A methylation pattern and impact on gene expression, microRNA levels and insulin  
309 secretion in human pancreatic islets. *Genome Biology* 2014;15:522-544.  
310
- 311 12. Schaefer S, Nadeau JH. The genetics of epigenetic inheritance: Modes, molecules and  
312 mechanisms Volume 90, *Quart Review Biology* 2015;90: Pages
- 313 13. Earon SA, Jayasooriah N, Buckland ME, Buckland ME, Martin DI, Cropley JE, Suter CM.  
314 Roll over Weismann: extracellular vesicles in the transgenerational transmission of  
315 environmental effects *Epigenomics* 2015; 7:1165-71.
- 316 14. Vaiserman AM, Koliada AK, Jirtles RL. Non-genomic transmission of longevity between  
317 generations: potential mechanisms and evidence across species. *Epigenetics Chromatin*  
318 2017;DOI 10.1186/s 13072-017-0145-1
- 319 15. Hellstenius, J. Skördarna i Sverige och deras verkningar. [Harvests in Sweden and their  
320 repercussions]. *Statistisk Tidskrift* 77-119. Stockholm, Sweden 1871 (sic).
- 321 16. Jörberg, L. (1972). A history of prices in Sweden 1732–1914. CWK Gleerup, Lund,  
322 Sweden.
- 323 17. Prader, A., Largo, L. Molinari and C. Issler (1989). Physical growth of Swiss  
324 children from birth to 20 years of age. First Zurich Longitudinal Study of Growth and  
325 Development. *Helvetica Paediatrica Acta* 43:Suppl 52: 1-125
- 326 18. Tanner, J.M. A History of the Study of Human Growth. Cambridge University Press,  
327 Cambridge 1981

Bygren & al. Early life Feast and Famine: The Methylome of disparate stressors inherited

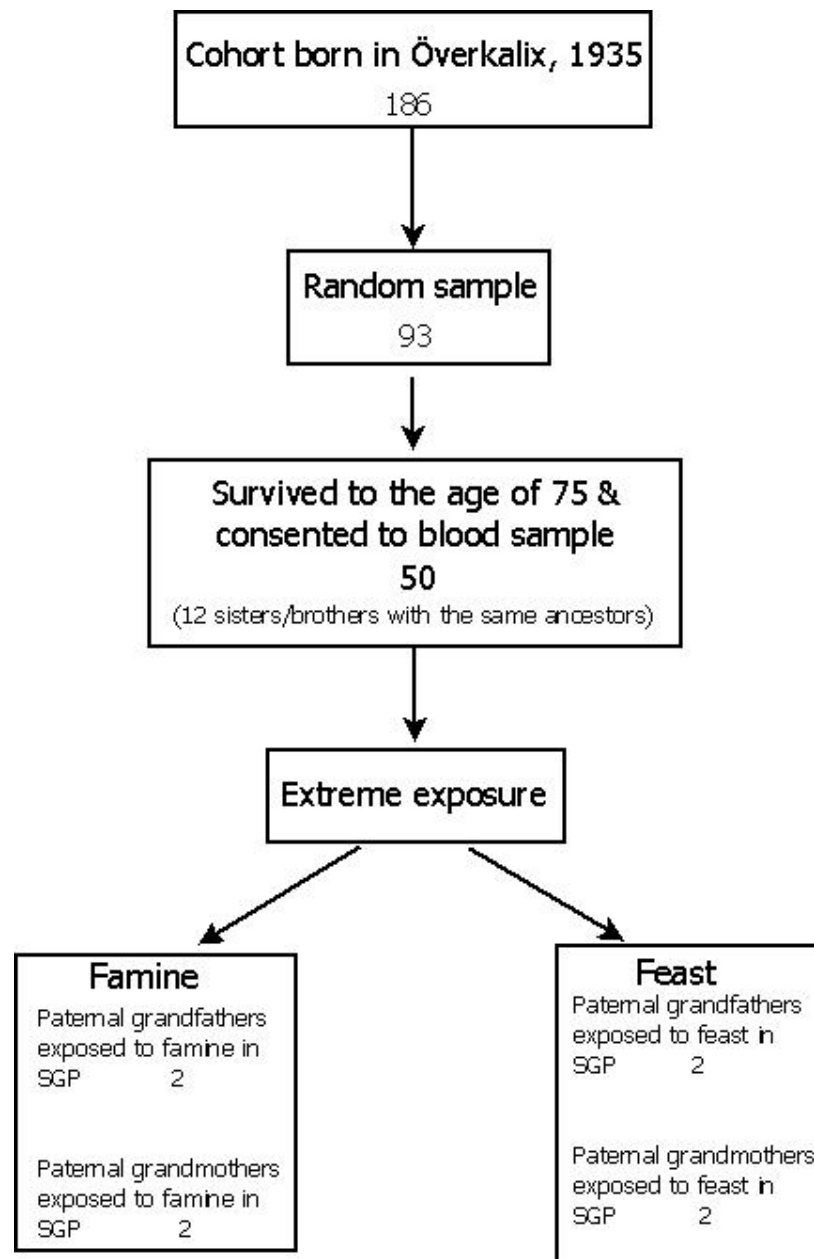

328

Figure 1. Flowchart

Bygren & al. Early life Feast and Famine: The Methyloome of disparate stressors inherited

329 Table 1. Gene ontology pathways describing reactions to hunger, excess food and stress at paternal  
330 grandparent's exposure to variable food availability, followed by DMRs in grandchildren

| Gene Ontology pathway                                  | Genes | CpGs | MethylCpG | DMR% | Shore, Shelf <sup>3</sup> |
|--------------------------------------------------------|-------|------|-----------|------|---------------------------|
| <b>Paternal grandfather with son and grandson</b>      |       |      |           |      |                           |
| 32100 Positively regulating appetite                   | 3     | 163  | 10        | 6%   | Northern shore            |
| 30070 Insulin processing <sup>1</sup>                  | 2     | 4    | 1         | 25%  | Southern shore            |
| 46952 Ketone body catabolic process                    | 4     | 16   | 1         | 6%   | Southern shore            |
| 21854 Hypothalamus development <sup>2</sup>            | 6     | 33   | 5         | 15%  | Southern shelf            |
| <b>Paternal grandmother with son and granddaughter</b> |       |      |           |      |                           |
| 1904179 Positive adipose development                   | 2     | 11   | 2         | 18%  | Northern shore            |
| 70341 Fat cell proliferation <sup>4</sup>              | 5     | 16   | 3         | 18%  | Southern shelf            |
| 51599 IGF receptor binding <sup>5</sup>                | 9     | 94   | 12        | 13%  | Northern shelf            |
| 46952 Ketone body catabolic process                    | 4     | 16   | 1         | 6%   | Southern shore            |
| 30325 Adrenal gland development                        | 12    | 57   | 4         | 7%   | Southern shelf            |

331

332

333 1. The formation of mature insulin by proteolysis of the precursor preproinsulin. The signal sequence  
334 is first elevated from preproinsulin, proinsulin is then cleaved to release the Cpeptide, leaving the A  
335 and B chain of mature insulin.

336 2. The progression of the hypothalamus region of the forebrain from its initial formation to its  
337 mature state.

338 3. CpG sites >200 bases with CpG content of 50% are termed "islands" (CGIs). Differential  
339 methylation induced by environment are most often seen in "northern- and southern-shores" <2kb  
340 from the islands, and "northern- and southern shelves" <2kb apart of the shores.

341 4. The multiplication or reproduction of fat cells resulting in expansion of their population.

342 5. Interacting selectively and non-covalently with the insulin-like growth factor receptor.

Bygren & al. Early life Feast and Famine: The Methylome of disparate stressors inherited

343 Table 2. Reproductive fitness following grandparental famine and feast in Slow Growth Period

| Index person                          | Age at first child's birth |        |            | Number of children |            | Longevity   |        |            |
|---------------------------------------|----------------------------|--------|------------|--------------------|------------|-------------|--------|------------|
|                                       | Grandparent                | Father | Grandchild | Father             | Grandchild | Grandparent | Father | Grandchild |
| <b>Paternal grandfathers exposure</b> |                            |        |            |                    |            |             |        |            |
| Famine                                |                            |        |            |                    |            |             |        |            |
| Index person No 15                    | 39                         | 38     | NA         | 4                  | NA         | 60          | 69     | 74+        |
| Index person No 53                    | 27                         | 31     | 27         | 7                  | 1          | 49          | 98     | 74+        |
| Feast                                 |                            |        |            |                    |            |             |        |            |
| Index person No 14                    | 28                         | 23     | 30         | 6                  | 3          | 80          | 70     | 74+        |
| Index person No 23                    | 33                         | 26     | NA         | 11                 | NA         | 94          | 83     | 63         |
| <b>Paternal grandmothers exposure</b> |                            |        |            |                    |            |             |        |            |
| Famine                                |                            |        |            |                    |            |             |        |            |
| Index person No 59                    | 39                         | 38     | 34         | 3                  | 2          | 80          | 83     | 74+        |
| Index person No 86                    | 24                         | 20     | 22         | 6                  | 2          | 55          | 64     | 74+        |
| Feast                                 |                            |        |            |                    |            |             |        |            |
| Index person No 3                     | 36                         | 29     | 23         | 10                 | 4          | 86          | 65     | 74+        |
| Index person No 22                    | 35                         | 31     | 29         | 4                  | 2          | 89          | 68     | 74+        |

344 NA. Not available
